# Supplementary material for: Tripodal oxazoline-based homochiral coordination cages with internal binding sites
Source: Royal Society of Chemistry journal article supplement (doi:10.1039/b514697f), 2006-01-01
Supplement: b514697f.pdf [file b514697f.pdf]

## Electronic Supplementary Information

### Tripodal-Oxazoline-Based Homochiral Coordination Cages with Internal Binding Sites

Jeongryul Kim,<sup>a</sup> Dowook Ryu,<sup>a</sup> Yoshihisa Sei,<sup>b</sup> Kentaro Yamaguchi<sup>b</sup> and Kyo Han Ahn<sup>\*a</sup>

<sup>a</sup> Department of Chemistry and Center for integrated Molecular Systems, Division of Molecular and Life Science, Pohang University of Science and Technology, San 31, Hyoja-dong, Pohang 790-784, Republic of Korea; Fax: +82) 54 279 3399; Tel: +82) 54 279 2105. E-mail: [ahn@postech.ac.kr](mailto:ahn@postech.ac.kr)

<sup>b</sup> Department of Pharmaceutical Technology, Faculty of Pharmaceutical Sciences at Kagawa Campus, Tokushima Bunri University, 1314-1 Shido, Sanuki-city, Kagawa, 769-2193 Japan. Fax: 81 87 894 0181; Tel: 81 87 894 5111; E-mail: [yamaguchi@kph.bunri-u.ac.jp](mailto:yamaguchi@kph.bunri-u.ac.jp)

#### 1. General Methods

All commercial reagents are of ACS reagent grade and used as supplied. DMF and CH<sub>2</sub>Cl<sub>2</sub> were dried over 4 Å molecular sieves and CaH<sub>2</sub>, respectively, and distilled before use. Metal precursors were prepared following the established procedures.<sup>1-3</sup> Column chromatography was carried out on Merck silica gel 60 (230-400 mesh). Melting points were obtained with an electrothermal capillary apparatus and were uncorrected. Optical rotations were measured using Rudolph Research Autopol III digital polarimeter using a sodium lamp (D line, 589 nm) and are reported in degrees with concentration in unit of 10 mg mL<sup>-1</sup>. <sup>1</sup>H and <sup>13</sup>C spectra were recorded using a Bruker AMX 300 or DRX 500 spectrometer and all chemical shifts were reported as δ in parts per million (ppm) downfield from tetramethylsilane (δ = 0.0). <sup>31</sup>P NMR spectra were recorded using a Bruker XP200 (81 MHz) spectrometer, and all chemical shifts were reported in ppm relative to external 80% H<sub>3</sub>PO<sub>4</sub> at 0.00 ppm. <sup>19</sup>F NMR spectra were recorded using a Bruker XP200 (188.3 MHz) spectrometer, and all chemical shifts were reported relative to external CFCl<sub>3</sub> at 0.00 ppm. Mass spectral analysis was recorded on Jeol JMS-AX505WA and is reported in units of mass to charge (*m/z*). CSI mass spectra were recorded on a QSTAR XL Hybrid LC/MS/MS System. Elemental

analyses and HRMS were performed by the Korea Basic Science Institute at Kyung-Pook Branch Analytical Laboratory.

Reference:

1. S. Fallis, G. K. Anderson and N. P. Rath, *Organometallics*, 1991, **10**, 3180-3184.
2. P. J. Stang, D. H. Cao, S. Saito and A. M. Arif, *J. Am. Chem. Soc.* 1995, **117**, 6273-6283.
3. M. Fujita, J. Yazaki and K. Ogura, *J. Am. Chem. Soc.* 1990, **112**, 5645-5647.

## 2. Syntheses and Characterization of compounds 1a and 1b.

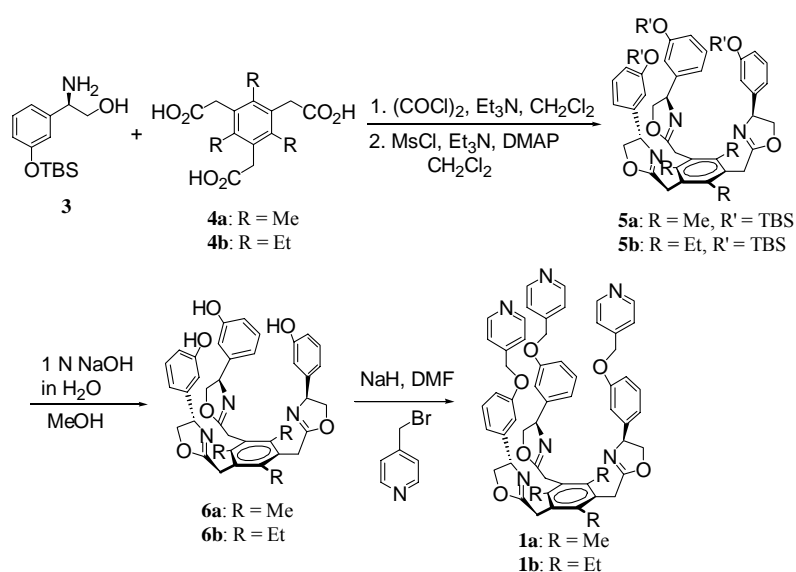

The Synthesis of intermediates **6** has been followed by the procedure reported in the reference 4 in the main paper. More specifically, compounds **5** and **6** have been used in the synthesis of other tripodal receptors, and their characterization data are included in a submitted paper.

**2-[(3,5-Bis{[4-(3-hydroxyphenyl)-4,5-dihydrooxazol-2-yl]methyl}-2,4,6-triethyl-phenyl)methyl-4-(3-hydroxyphenyl)-4,5-dihydrooxazole-4-yl]phenoxy}methyl-4-pyridine (**1b**).** NaH (350 mg, 14.55 mmol) was added in small portions into a solution of **6b** (1.0 g, 1.46 mmol) in dry DMF (20 mL). After hydrogen gas evolution is subsided, the mixture was stirred at room temperature for 30 min. A solution of 4-bromomethylpyridine (1.84 g, 7.27 mmol) in CH<sub>2</sub>Cl<sub>2</sub> (100 mL) was introduced into the reaction mixture using a syringe. The resulting mixture was stirred at room temperature for 24 h, and it was poured into an Erlenmeyer flask containing a mixture of water/dichloromethane. The organic layer was separated, washed with brine, dried over anhydrous MgSO<sub>4</sub>, and concentrated to dryness. The residue was purified by column

chromatography (MeOH:EtOAc, 3:7) to afford the desired pyridyl-tris(oxazoline) **1b** as white powders (0.75 g, 54%). (4-Bromomethylpyridine was freshly prepared before use by the following method: A saturated aqueous Na<sub>2</sub>CO<sub>3</sub> solution was added to a stirred solution of 4-bromomethylpyridine·HBr (1.84 g, 7.27 mmol) in distilled water (50 ml) at 0 °C, at such a rate to maintain the temperature <5 °C and to reach pH ~7. Then, 4-bromomethylpyridine was extracted with dichloromethane, dried over anhydrous MgSO<sub>4</sub>, and filtered. The filtrate (100 ml) was used without further purification.) **1b**: mp 109-101 °C; [ $\alpha$ ]<sub>D</sub><sup>21</sup> = +2.5 (*c* = 1.0, CH<sub>2</sub>Cl<sub>2</sub>); <sup>1</sup>H NMR (300 MHz, CD<sub>2</sub>Cl<sub>2</sub>)  $\delta$  8.59 (d, *J* = 5.7 6H), 7.36 (d, *J* = 5.6 6H), 7.24 (dd, *J* = 7.9, 7.5 3H), 6.88-6.84 (m, 9H), 5.13 (dd, *J* = 9.1, 8.4 3H), 5.07 (s, 6H), 4.60 (dd, *J* = 9.4, 8.6 3H), 4.03 (dd, *J* = 8.4, 7.9 3H), 3.85 (s, 6H), 2.94 (q, *J* = 7.5 6H), 1.24 (t, *J* = 7.5 9H); <sup>13</sup>C NMR (75 MHz, CD<sub>2</sub>Cl<sub>2</sub>)  $\delta$  167.9, 159.0, 150.5, 146.6, 145.1, 142.6, 130.7, 130.2, 121.9, 120.0, 114.0, 113.5, 75.1, 70.0, 68.6, 29.1, 23.9, 14.9; MS (FAB) *m/z* (rel. intensity) 962 (M+1, 100), 871 (12), 735 (8); HRMS (FAB) calcd. for C<sub>60</sub>H<sub>61</sub>O<sub>6</sub>N<sub>6</sub> 961.4653, found 961.4650.

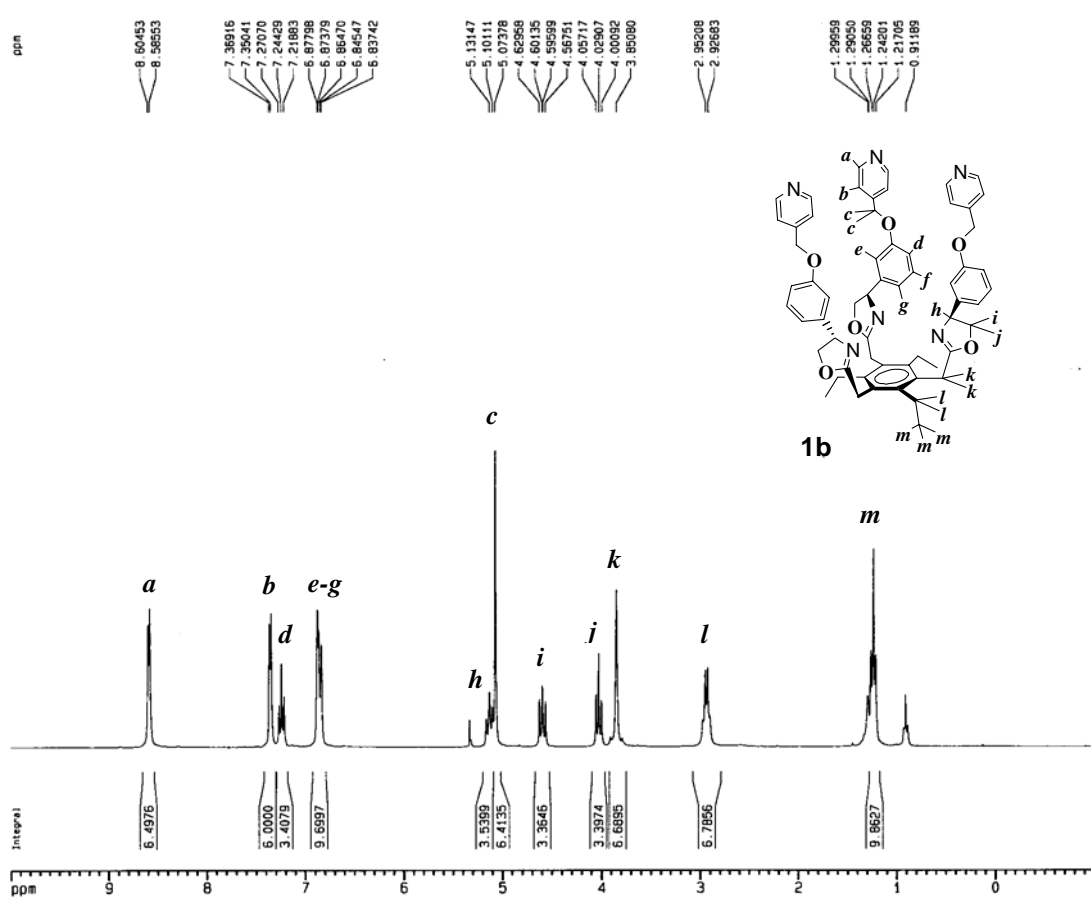

**2-[(3,5-Bis{[4-(3-hydroxyphenyl)-4,5-dihydrooxazol-2-yl]methyl}-2,4,6-trimethyl-phenyl)methyl-4-(3-hydroxyphenyl)-4,5-dihydrooxazole-4-yl]phenoxy}methyl-4-pyridine (**1a**).** This compound was synthesized similarly as above starting from compound **5a**. The crude product was purified by column chromatography (MeOH:EtOAc, 3:7) to afford **1a** in 63% yield as white solids: mp 92-94 °C; <sup>1</sup>H NMR (300 MHz, acetone-d<sub>6</sub>) δ 8.48 (d, *J* = 5.3 6H), 7.44 (d, *J* = 4.8 6H), 7.20 (dd, *J* = 8.3, 7.6 3H), 6.89-6.79 (m, 9H), 5.06 (s, 9H), 4.59 (dd, *J* = 9.4, 8.6 3H), 3.99 (dd, *J* = 8.7, 8.1 3H), 3.86 (s, 6H), 2.45 (s, 9H); <sup>13</sup>C NMR (75 MHz, acetone-d<sub>6</sub>) δ 170.3, 160.2, 150.4, 149.5, 145.6, 137.3, 132.0, 131.2, 123.4, 120.8, 115.2, 114.4, 76.4, 70.1, 69.1, 30.8, 17.8; MS (FAB) *m/z* (rel. intensity) 919 (M+1, 100), 846 (41); HRMS (FAB) calcd. for C<sub>57</sub>H<sub>54</sub>N<sub>6</sub>O<sub>6</sub> 918.4105, found 918.4112.

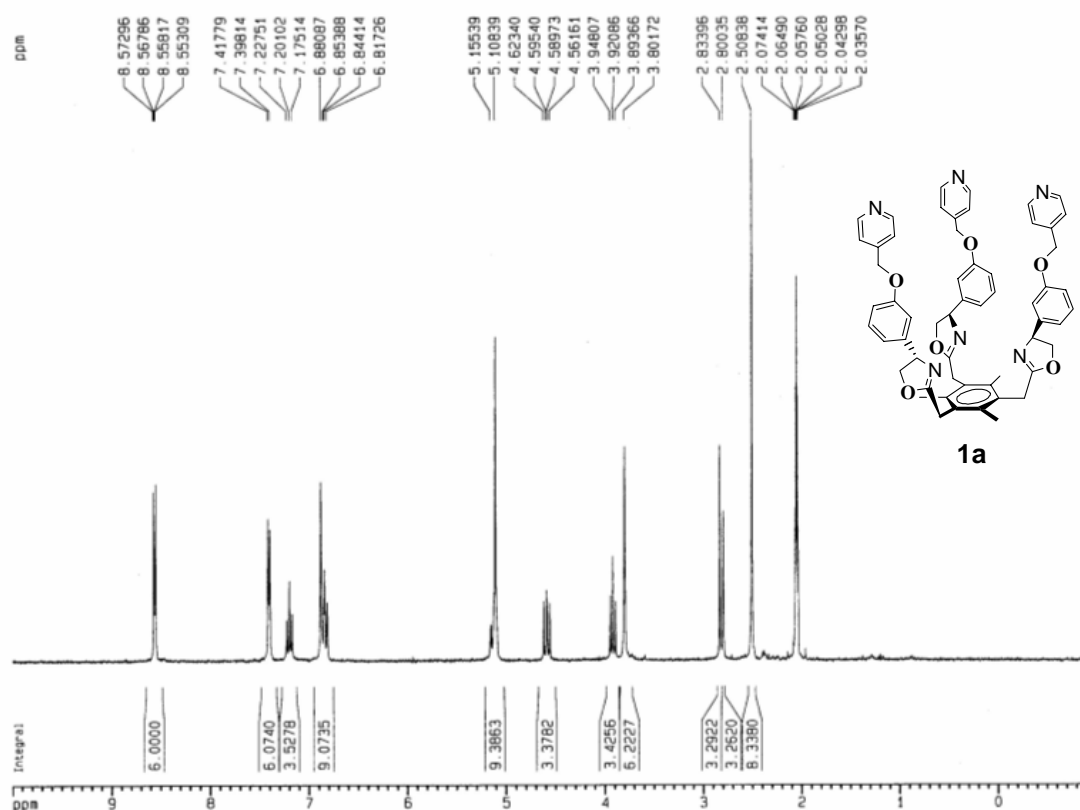

**Cage 2b.** This complex was assembled by mixing tripodal oxazoline **1b** with *trans*-Pd(OTf)<sub>2</sub>(PEt<sub>3</sub>)<sub>2</sub> in a molar ratio of 2:3 in CH<sub>2</sub>Cl<sub>2</sub> at room temperature for 5 min. Removal of the solvent in vacuo afforded the desired cage in a quantitative yield. The

peak at 1.2 ppm in the  $^1\text{H}$  NMR spectrum is owing to the presence of “free”  $\text{Et}_3\text{P}$  because a slight excess amount of the palladium source was used:

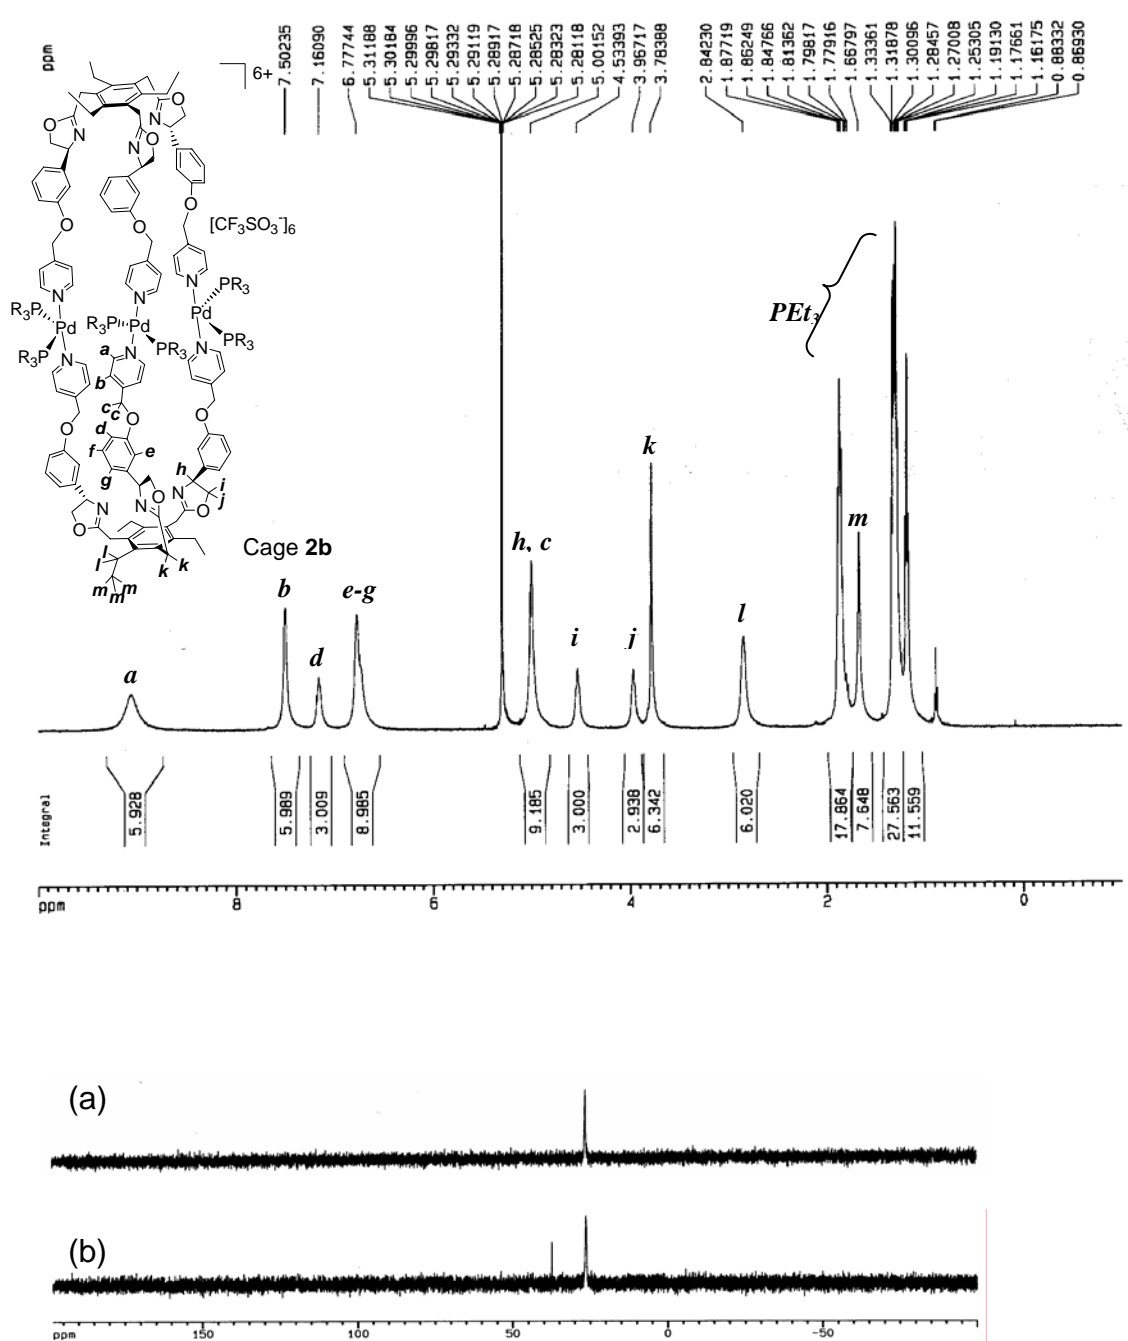

**Fig. S1**  $^{31}\text{P}$  NMR spectra obtained for a mixture of **1b** and  $\text{Pd}(\text{PEt}_3)_2(\text{OTf})_2$  in  $\text{CD}_2\text{Cl}_2$  at 25 °C with different molar ratios: (a) at a molar ratio of 2:3; (b) when more than 1.5 equiv of the Pd source was added to the solution (a).

(a)

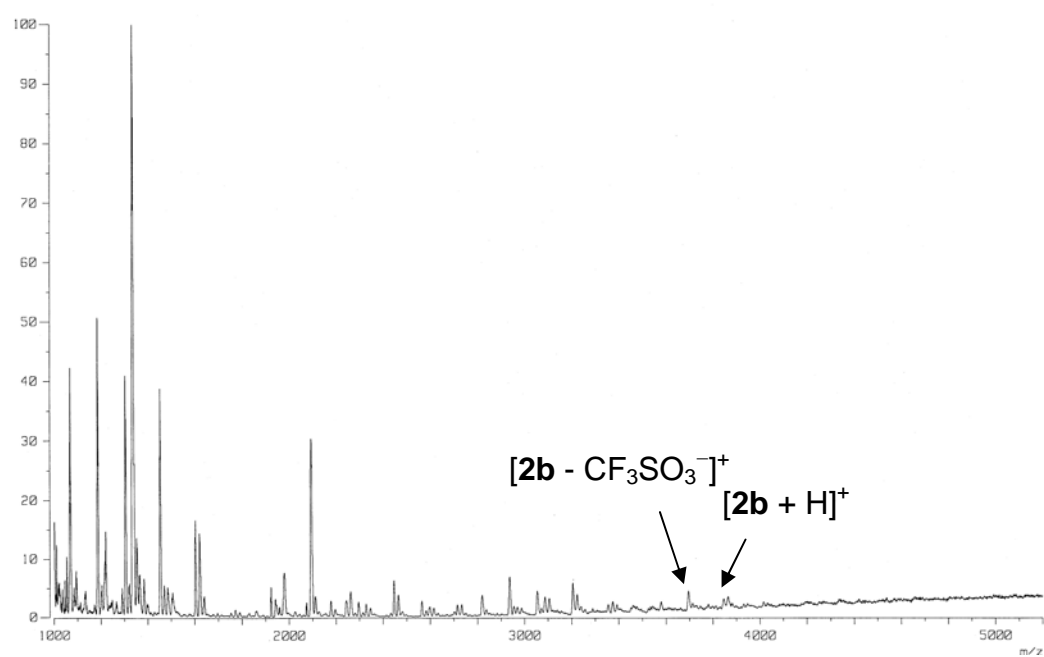

(b)

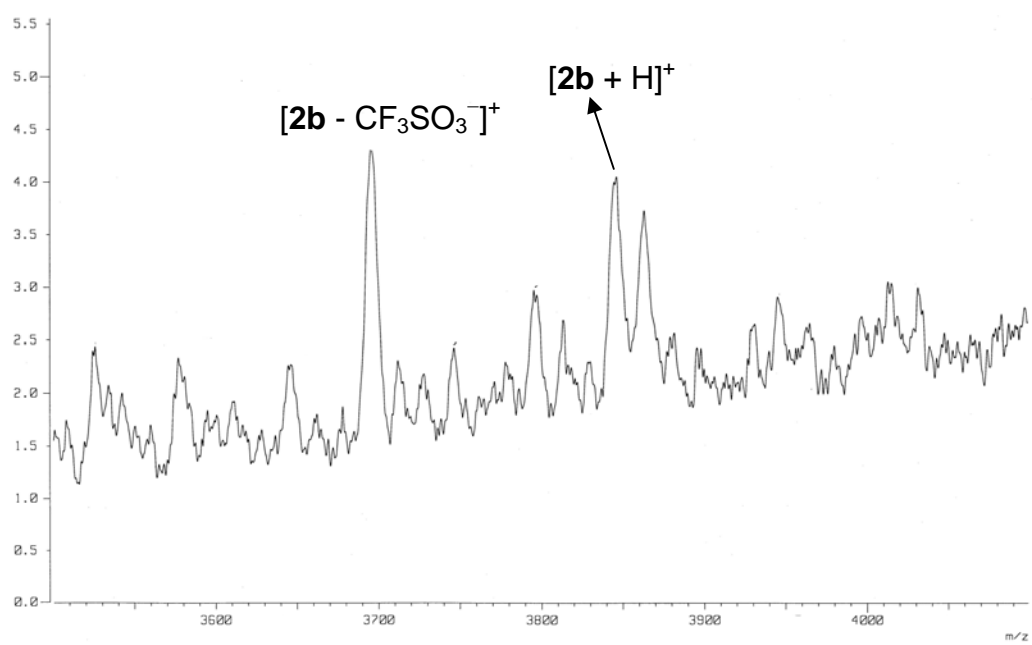

(c)

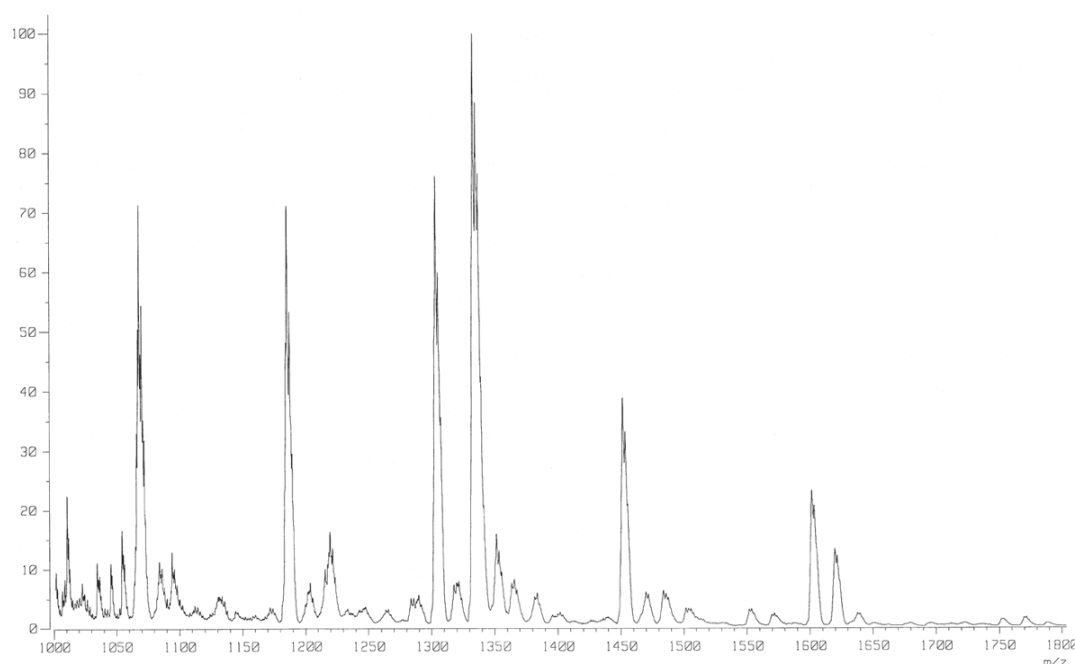

**Fig. S2** (a) CSI-MS spectrum for the cage **2b**, (b) an enlarged part of the  $m/z$  range 3500-4100, (c) an enlarged part of the  $m/z$  range 1000-1800. Experimental conditions: acceleration voltage, 5.0 kV; needle voltage, 2.8 kV; orifice voltage, 202 V; ring lens voltage, 254 V; spray temperature, 20 °C; resolution: 1000; flow rate, 1.0 mL/h; solvent: CH<sub>2</sub>Cl<sub>2</sub>.

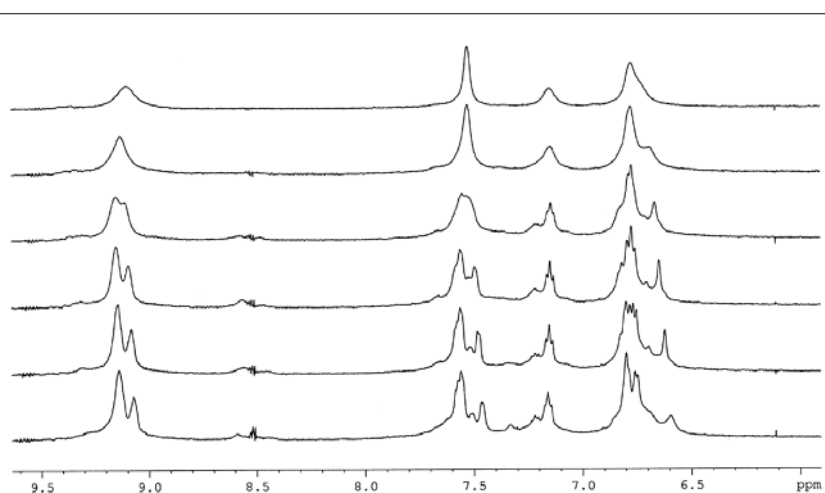

**Fig. S3** A selected region of the VT-NMR experimental data for the cage **2b** (from the bottom, taken at -40, -20, -5, 10, 25, 40 °C)

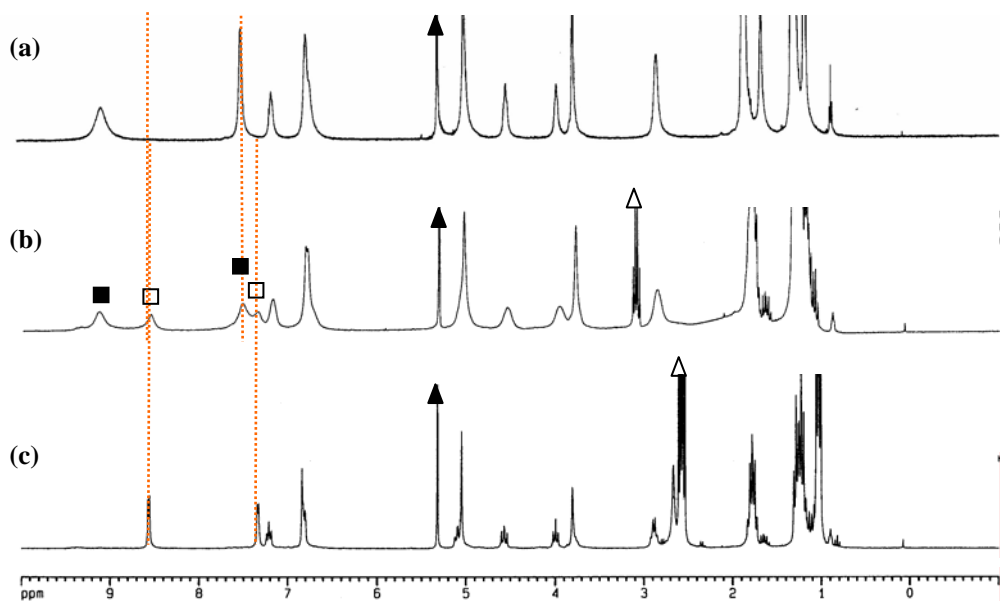

**Fig. S4** The disassembly experiment of the cage **2b** in the presence of  $\text{Et}_3\text{N}$ : (a) cage **2b** as single component, (b) partial disassembly into its free ligand **1b** after addition of 0.7 equiv of  $\text{Et}_3\text{N}$ , (c) complete disassembly into **1b** in the presence of excess  $\text{Et}_3\text{N}$  (10 equiv) at 300K. (■: cage, □: ligand, ▲: solvent, Δ:  $\text{Et}_3\text{N}$ )

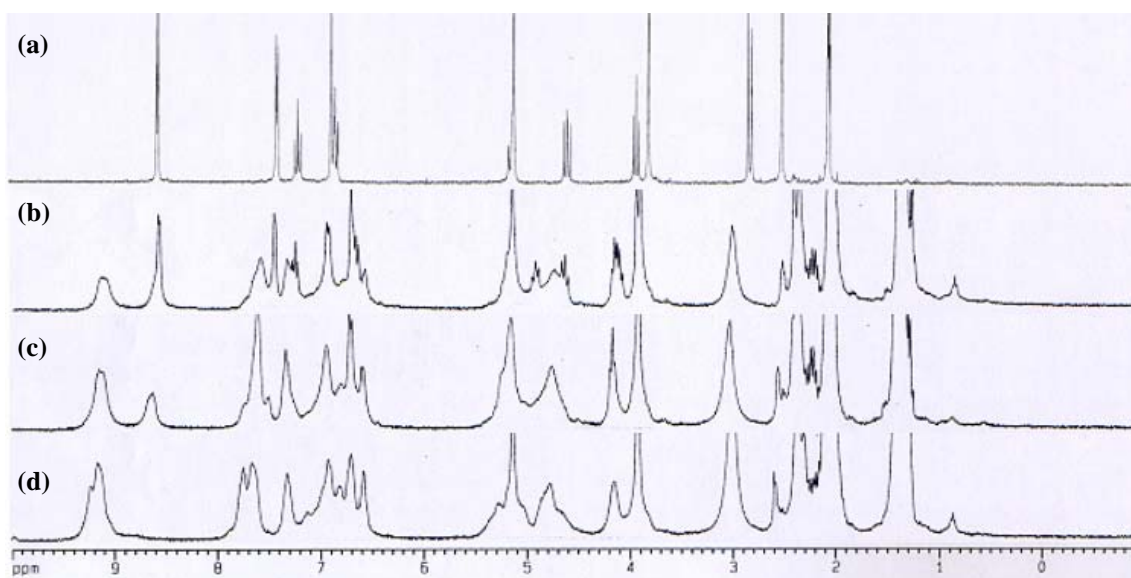

**Fig. S5** Self-assembly of **1a** and  $[\text{Pd}(\text{OTf})_2(\text{PET}_3)_2]$ , monitored by  $^1\text{H}$  NMR in acetone- $d_6$  at 25 °C: (a) free **1a**; (b) a mixture of **[1a]**/ $[\text{Pd}(\text{OTf})_2(\text{PET}_3)_2]$  in a ratio of 2/1; (c) in a ratio of 1/1; (d) in a ratio of 2/3.

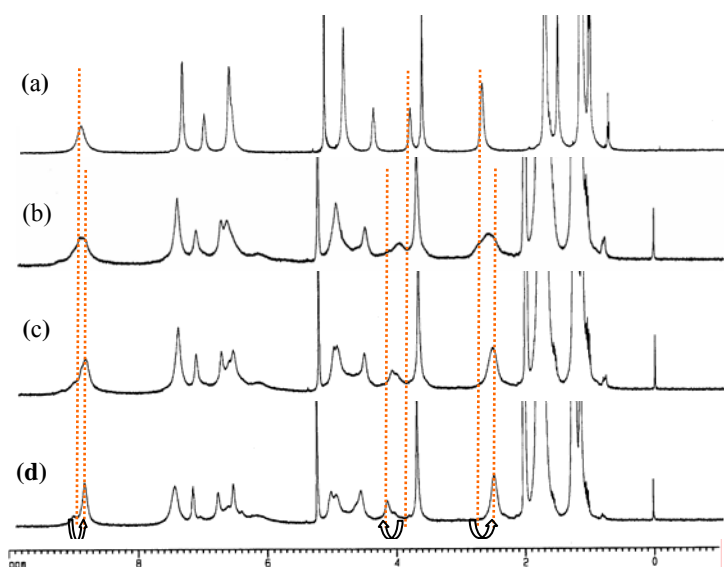

**Fig. S6**  $^1\text{H}$  NMR spectral change of the cage **2b** upon gradual addition of  $\text{NH}_4\cdot\text{PF}_6$  in  $\text{CD}_2\text{Cl}_2$  at  $25^\circ\text{C}$ : (a) free cage **2b**, (b) 0.5 equiv. of the guest added, (c) 1.0 equiv. of the guest added, (d) 2.0 equiv. the guest added (Note: a small amount of acetone was used to dissolve the guest).

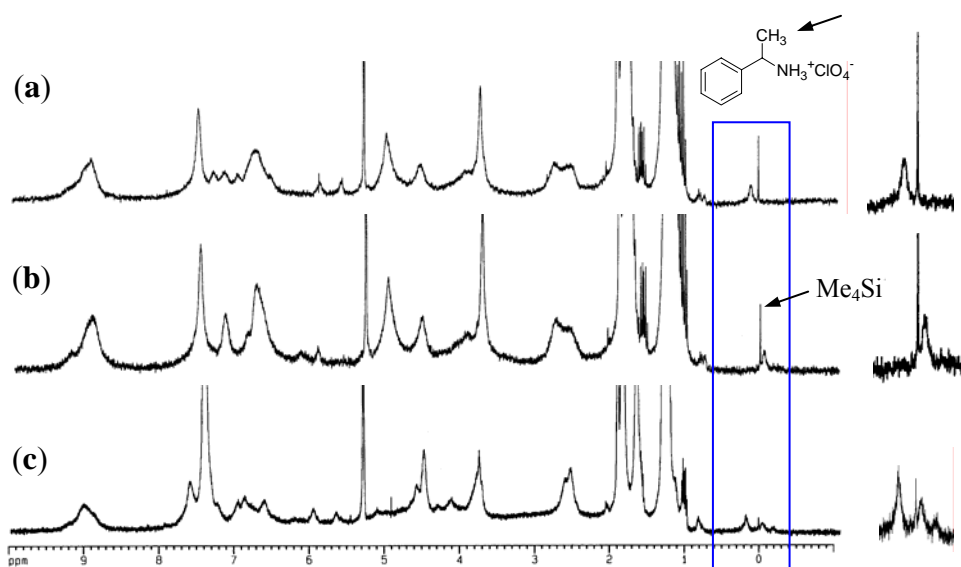

**Fig. S7**  $^1\text{H}$  NMR spectral change of cage **2b** upon addition of enantiomeric and racemic  $\alpha$ -phenylethylammonium perchlorate (The guest methyl group indicated in the box is enlarged and shown at the right side): (a)  $[\text{2b}]/[(R)\text{-guest}] = 1/2$ ; (b)  $[\text{2b}]/[(S)\text{-guest}] = 1/2$ ; (c)  $[\text{2b}]/[\text{racemic guest}] = 1/4$ .
